1           **Structural and biochemical characterization of nsp12-nsp7-nsp8 core polymerase**

2                                                           **complex from COVID-19 virus**

3   Qi Peng<sup>1,6</sup>, Ruchao Peng<sup>1,6</sup>, Bin Yuan<sup>1,2,6</sup>, Jingru Zhao<sup>1,2,6</sup>, Min Wang<sup>1</sup>, Xixi Wang<sup>1</sup>, Qian  
4   Wang<sup>1,2</sup>, Yan Sun<sup>2</sup>, Zheng Fan<sup>1</sup>, Jianxun Qi<sup>1,2,3</sup>, George F. Gao<sup>1,2,3</sup>, Yi Shi<sup>1,2,3,4,5,7,\*</sup>

5   <sup>1</sup>CAS Key Laboratory of Pathogenic Microbiology and Immunology, Institute of Microbiology,  
6   Chinese Academy of Sciences, Beijing, China.

7   <sup>2</sup>Savaid Medical School, University of Chinese Academy of Sciences, Beijing, China.

8   <sup>3</sup>Center for Influenza Research and Early-warning (CASCIRE), CAS-TWAS Center of  
9   Excellence for Emerging Infectious Disease (CEEID), Chinese Academy of Sciences, Beijing,  
10   China.

11   <sup>4</sup>Chongqing Key Laboratory of Neurodegenerative Diseases, Chongqing General Hospital,  
12   University of Chinese Academy of Sciences, Chongqing, China.

13   <sup>5</sup>College of Basic Medicine, Jilin University, Changchun, China.

14   <sup>6</sup>These authors contributed equally: Qi Peng, Ruchao Peng, Bin Yuan and Jingru Zhao.

15   <sup>7</sup>Lead contact

16   \*Correspondence: shiyi@im.ac.cn

17

18 **Summary**

19 **The ongoing global pandemic of coronavirus disease 2019 (COVID-19) has caused huge**  
20 **number of human deaths. Currently, there are no specific drugs or vaccines available for**  
21 **this virus. The viral polymerase is a promising antiviral target. However, the structure of**  
22 **COVID-19 virus polymerase is yet unknown. Here, we describe the near-atomic**  
23 **resolution structure of its core polymerase complex, consisting of nsp12 catalytic subunit**  
24 **and nsp7-nsp8 cofactors. This structure highly resembles the counterpart of SARS-CoV**  
25 **with conserved motifs for all viral RNA-dependent RNA polymerases, and suggests the**  
26 **mechanism for activation by cofactors. Biochemical studies revealed reduced activity of**  
27 **the core polymerase complex and lower thermostability of individual subunits of COVID-**  
28 **19 virus as compared to that of SARS-CoV. These findings provide important insights into**  
29 **RNA synthesis by coronavirus polymerase and indicate a well adaptation of COVID-19**  
30 **virus towards humans with relatively lower body temperatures than the natural bat hosts.**

31

## 32 **Introduction**

33 In the end of 2019, a novel coronavirus (2019-nCoV) caused an outbreak of pulmonary disease  
34 in China (Zhu et al., 2020), which was later officially named “severe acute respiratory syndrome  
35 virus 2” (SARS-CoV-2) by the International Committee on Taxonomy of Viruses (ICTV)  
36 (Coronaviridae Study Group of the International Committee on Taxonomy of, 2020). The  
37 pneumonia disease was named coronavirus disease 2019 (COVID-19) by world health  
38 organization (WHO). The outbreak has developed into a global pandemic affecting most  
39 countries all over the world (Holshue et al., 2020; Kim et al., 2020). As of April 19<sup>th</sup>, 2020,  
40 more than 2,000,000 human infections have been reported worldwide, including over 160,000  
41 deaths (<https://www.who.int/emergencies/diseases/novel-coronavirus-2019>). The origin of this  
42 virus has not been identified, but multiple origins possibly exist based on the recent  
43 bioinformatics analysis of the viral isolates from different countries (Andersen et al., 2020;  
44 Zhang and Holmes, 2020). So far, there are no specific drugs or vaccines available yet, which  
45 poses a great challenge for the treatment and control of the diseases.

46 SARS-CoV-2 belongs to the family of *Coronaviridae*, a group of positive-sense RNA  
47 viruses with a broad host-spectrum (Vicenzi et al., 2004). Currently, a total of seven human-  
48 infecting coronaviruses have been identified, among which SARS-CoV-2 displays the highest  
49 similarity in genome sequence to the SARS-CoV emerged in 2002-2003 (Zhong et al., 2003;  
50 Zhou et al., 2020). Both viruses utilize the same host receptor angiotensin-converting enzyme  
51 2 (ACE2) for cell entry and cause respiratory symptoms that may progress to severe pneumonia  
52 and lead to death (Lu et al., 2020; Zhou et al., 2020). However, as compared to the SARS-CoV,  
53 SARS-CoV-2 shows a much higher transmission rate and a lower mortality (Huang et al., 2020;

54 Wang et al., 2020). Most of the infections result in mild symptoms and a substantial number of  
55 asymptomatic infection cases have also been reported (Rothe et al., 2020). These properties  
56 allow the SARS-CoV-2 to transmit among humans furtively, facilitating the quantum-leaps of  
57 pandemic expansion. Characterizing the infection and replication behaviors of SARS-CoV-2  
58 would provide critical information for understanding its unique pathogenesis and host-adaption  
59 properties.

60 The replication of coronavirus is operated by a set of non-structural proteins (nsps)  
61 encoded by the open-reading frame 1a (ORF1a) and ORF1ab in its genome, which are initially  
62 translated as polyproteins followed by proteolysis cleavage for maturation (Ziebuhr, 2005).  
63 These proteins assemble into a multi-subunit polymerase complex to mediate the transcription  
64 and replication of viral genome. Among them, nsp12 is the catalytic subunit with RNA-  
65 dependent RNA polymerase (RdRp) activity (Ahn et al., 2012). The nsp12 itself is capable of  
66 conducting polymerase reaction with extremely low efficiency, whereas the presence of nsp7  
67 and nsp8 cofactors remarkably stimulates its polymerase activity (Subissi et al., 2014). The  
68 nsp12-nsp7-nsp8 subcomplex is thus defined as the minimal core components for mediating  
69 coronavirus RNA synthesis. To achieve the complete transcription and replication of viral  
70 genome, several other nsp subunits are required to assemble into a holoenzyme complex,  
71 including the nsp10, nsp13, nsp14 and nsp16, for which the precise functions for RNA synthesis  
72 have not been well understood (Adedeji et al., 2012; Lehmann et al., 2015; Sevajol et al., 2014;  
73 Ziebuhr, 2005). The viral polymerase has shown enormous prospect as a highly potent antiviral  
74 drug target due to its higher evolutionary stability, compared to the surface proteins that are  
75 more prone to drift as a result of the selection by host immunity (Shi et al., 2013). Therefore,

76 understanding the structure and functions of SARS-CoV-2 polymerase complex is an essential  
77 prerequisite for developing novel therapeutic agents.

78 In this work, we determined the near-atomic resolution structure of SARS-CoV-2 nsp12-  
79 nsp7-nsp8 core polymerase complex by cryo-electron microscopy (cryo-EM) reconstruction,  
80 and revealed the reduced polymerase activity and thermostability as compared to its SARS-  
81 CoV counterpart. These findings improve our understanding of coronavirus replication and  
82 evolution which might contribute to the fitness of SARS-CoV-2 to human hosts.

83

## 84 **Results**

### 85 **Overall structure of SARS-CoV-2 core polymerase complex**

86 The SARS-CoV-2 nsp12 polymerase and nsp7-nsp8 cofactors were expressed using the  
87 baculovirus and *Escherichia coli* (*E. coli*) expression systems, respectively. The three protein  
88 subunits were mixed *in vitro* to constitute the core polymerase complex (Figure S1). The  
89 structure of SARS-CoV-2 nsp12-nsp7-nsp8 complex was determined at 3.7 Å resolution, which  
90 clearly resolved the main chain trace and most bulky side chains of each subunit (Figures S2  
91 and S3). Similar to the counterpart complex of SARS-CoV (Kirchdoerfer and Ward, 2019), the  
92 N-terminal ~110 amino acids of nsp12, as well as the N-terminal ~80 residues of nsp8 and a  
93 small portion of nsp7 C-terminus, could not be resolved in the density map (Figure 1A). In total,  
94 approximately 80% of the 160-kDa complex was interpreted in the structure.

95 The SARS-CoV-2 polymerase complex consists of a nsp12 core catalytic subunit bound  
96 with a nsp7-nsp8 heterodimer and an additional nsp8 subunit at a different binding site (Figure  
97 1B). The N-terminal portion of nsp12 polymerase subunit contains a Nidovirus RdRp-

98 associated nucleotidyltransferase (NiRAN) domain that is shared by all members of the  
99 *Nidovirales* order (Lehmann et al., 2015). This domain binds at the back side of the right-hand  
100 configured C-terminal RdRp. Between them is an interface domain that links the NiRAN  
101 domain to the fingers subdomain of RdRp (Figure 1B and C). The NiRAN and interface  
102 domains represent additional features of coronavirus RdRp as compared to the polymerase  
103 subunit of flaviviruses which is also a group of positive-sense RNA viruses (Duan et al., 2017;  
104 Godoy et al., 2017; Zhao et al., 2017). The C-terminal catalytic domain adopts a conserved  
105 architecture of all viral RdRps, composed of the fingers, palm and thumb subdomains (Figure  
106 1C). A remarkable feature of the coronavirus RdRp is the long finger extension that intersects  
107 with the thumb subdomain to form a closed-ring structure (Figure 1C), in contrast to the smaller  
108 loop in segmented negative-sense RNA virus (sNSV) polymerases which results in a relatively  
109 open conformation, such as influenza virus, bunyavirus and arenavirus polymerases (Figure  
110 S4) (Gerlach et al., 2015; Peng et al., 2020; Pflug et al., 2014). Similar close contact between  
111 the fingers and thumb subdomains is also observed in the structures of poliovirus (PV) and Zika  
112 virus (ZIKV) polymerases (Figure S4) (Godoy et al., 2017; Gong and Peersen, 2010), which  
113 might be a common feature of positive-sense RNA virus polymerases.

114

#### 115 **Structural comparison of SARS-CoV-2 and SARS-CoV nsp12-nsp7-nsp8 complexes**

116 Basically, the structure of SARS-CoV-2 polymerase complex highly resembles that of SARS-  
117 CoV, with a global root mean square deviation (RMSD) of  $\sim 1$  Å for the  $\alpha$ -carbon atoms (Figure  
118 2A). There are 1, 4 and 25 residue substitutions between the two viruses in the structurally  
119 visualized regions of nsp7, nsp8 and nsp12 subunits, respectively (Figure 2B) (there are 1 and

120 7 additional site mutations in the unresolved regions of nsp8 and nsp12 subunits, respectively).

121 However, these mutations did not result in obvious structural changes of the polymerase

122 complex. During the review process of this manuscript, two other research groups also reported

123 the high-resolution structure of SARS-CoV-2 core polymerase complex at atomic resolutions,

124 which revealed similar structural features to the SARS-CoV counterpart, consistent with our

125 observations (Gao et al., 2020; Yin et al., 2020). All of the three structures reported by our

126 group and others' revealed similar structural features, including the partially unresolved N-

127 terminal portion of nsp8 and a small C-terminal tail of nsp7 subunits, and allowed the

128 identification of a previously undefined  $\beta$ -hairpin motif in the N-terminus of nsp12 subunit

129 which binds at the interface between the NiRAN domain and the palm subdomain of RdRp

130 (Figure 2C). However, no extra density for this region was observed in the reconstruction of

131 SARS-CoV polymerase complex (Figure 2D), suggesting the different conformation or

132 flexibility of this motif between the two viruses. Of note, in the structure determined by Gao et

133 al., the N-terminal residues 51-117 of nsp12 subunit were clearly resolved to constitute an

134 almost complete NiRAN domain (Gao et al., 2020). In contrast, this region revealed poor

135 density in the reconstructions by our group and Yin et al., suggesting the moderate flexibility

136 of this region (Yin et al., 2020), for which the functional relevance yet remained elusive.

137

### 138 **Conserved catalytic center of nsp12 and interaction with cofactors**

139 The catalytic domain of SARS-CoV-2 nsp12 subunit is arranged following the typical right-

140 hand configuration shared by all viral RdRps, which includes seven critical catalytic motifs (A-

141 G) (Figure 3). Among them, motifs A-F are highly conserved for all viral RdRps, and the motif

142 G is defined as a hallmark of primer-dependent RdRp in some positive-sense RNA viruses  
143 which interacts the primer strand to initiate RNA synthesis (Figure S4). The motif C contains  
144 the critical 759-SDD-761 catalytic residues which reside in a  $\beta$ -turn loop connecting two  
145 adjacent strands. The motif F forms a finger-tip that protrudes into the catalytic chamber and  
146 interacts with the finger extension loops and the thumb subdomain (Figure 3B). It has been  
147 shown that some sNSV polymerases, e.g. influenza virus and bunyavirus polymerases, require  
148 the binding of a conserved 5'-RNA hook to activate the activity for RNA synthesis by  
149 stabilizing the finger-tip which is otherwise highly flexible in the apo form (Gerlach et al., 2015;  
150 Hengrung et al., 2015; Peng et al., 2020; Pflug et al., 2014; Reich et al., 2014). In the structure  
151 of coronavirus polymerase, this finger-tip loop is stabilized by the adjacent finger extension  
152 loops which are secured by the interactions with nsp7-nsp8 heterodimer (Figure 1B and C). In  
153 the absence of this heterodimer, the finger extension loops displayed significant flexibility as  
154 observed in the structure of SARS-CoV nsp12-nsp8 subcomplex, which would thus destabilize  
155 the finger-tip motif (Figure S4G and H) (Kirchdoerfer and Ward, 2019). These evidences are  
156 consistent with the observation that the nsp12 alone shows extremely weak activity for  
157 nucleotide polymerization, whereas this activity is remarkably stimulated upon the binding of  
158 nsp7-nsp8 cofactors (Ahn et al., 2012; Subissi et al., 2014).

159 The nsp7-nsp8 heterodimer binds above the thumb subdomain of RdRp and sandwiches  
160 the finger extension loops in between to stabilize its conformation (Figure 1B). This interaction  
161 is mainly mediated by the nsp7 within the heterodimer while the nsp8 (nsp8.1) contributes few  
162 contacts with the nsp12 polymerase subunit (Figures 1B and 3D). The other nsp8 (nsp8.2)  
163 subunit clamps the top region of the finger subdomain and forms additional interactions with



164 the interface domain (Figures 1B and 3D). The two nsp8 subunits display significantly different  
165 conformations with substantial refolding of the N-terminal extension helix region, which  
166 mutually preclude the binding at the other molecular context (Figure 3C). The importance of  
167 both cofactor-binding sites has been validated by previous biochemical studies on SARS-CoV  
168 polymerase, which revealed their essential roles for stimulating the activity of nsp12  
169 polymerase subunit (Subissi et al., 2014).

170       Based on the elongation complex of poliovirus polymerase (Gong and Peersen, 2010), we  
171 modeled the RNA template and product strands into the catalytic chamber of SARS-CoV-2  
172 nsp12 subunit. This pseudo-elongation intermediate structure reveals the template entrance is  
173 supported by the finger extension loops and the finger-tip to guide the 3'-viral RNA (3'-vRNA)  
174 achieving the catalytic chamber (Figure 3D). The nucleotide-triphosphate (NTP) substrate  
175 enters through a channel at the back side of palm subdomain to reach the active site. The  
176 template and product strands form a duplex to exit the polymerase chamber in the front (Figure  
177 3D). Since the viral genome and sub-genomic mRNA products are both functional in single-  
178 stranded form, it requires further steps assisted by other nsp subunits to separate the duplex for  
179 complete transcription and replication processes.

180

### 181 **The reduced activity of SARS-CoV-2 core polymerase complex**

182 Given the residue substitutions between SARS-CoV-2 and SARS-CoV polymerase subunits  
183 albeit the high degree overall sequence similarity, we compared the enzymatic behaviors of the  
184 viral polymerases aiming to analyze their properties in terms of viral replication. Both sets of  
185 core polymerase complex could well mediate primer-dependent RNA elongation reactions

186 templated by the 3'-vRNA. Intriguingly, the SARS-CoV-2 nsp12-nsp7-nsp8 complex displayed  
187 a much lower efficiency (~35%) for RNA synthesis as compared to the SARS-CoV counterpart  
188 (Figure 4A). As all three nsp subunits harbor some residue substitutions between the two  
189 viruses, we further conducted cross-combination analysis to evaluate the effects of each subunit  
190 on the efficiencies of RNA production. In the context of SARS-CoV-2 nsp12 polymerase  
191 subunit, replacement of the nsp7 cofactor subunit with that of SARS-CoV did not result in  
192 obvious effect on polymerase activity, whereas the introduction of SARS-CoV nsp8 subunit  
193 greatly boosted the activity to ~2.1 times of the homologous combination. Simultaneous  
194 replacement of the nsp7 and nsp8 cofactors further enhanced the efficiency for RNA synthesis  
195 to ~2.2 times of that for the SARS-CoV-2 homologous complex (Figure 4B). Consistent with  
196 this observation, the combination of SARS-CoV-2 nsp7-nsp8 subunits with the SARS-CoV  
197 nsp12 polymerase subunit compromised its activity as compared to the native cognate cofactors,  
198 among which the nsp8 subunit exhibited a more obvious effect than that for nsp7 (Figure 4C).  
199 These evidences suggested that the variations in nsp8 subunit rendered a significantly negative  
200 impact on the polymerase activity of SARS-CoV-2 nsp12. The non-significant effect of nsp7  
201 on polymerase activity was quite conceivable as only one residue substitution occurred between  
202 the two viruses (Figure 2B). In addition, we also compared the polymerase activity of different  
203 nsp12 subunits in the same context of nsp7-nsp8 cofactors. Combined with either cofactor sets,  
204 the SARS-CoV-2 nsp12 polymerase showed a lower efficiency (~50%) for RNA synthesis as  
205 compared to the SARS-CoV counterpart (Figure 4D). This observation demonstrated that the  
206 residue substitutions in nsp12 also contributed to the reduction of its polymerase activity, with  
207 similar impact to the variations in the nsp8 cofactor.

208

### 209 **Impacts of amino acid substitutions on the core polymerase subunits**

210 Despite that there are amino acid substitutions in all three subunits of the core polymerase  
211 complex between SARS-CoV-2 and SARS-CoV, none of these residues is located at the  
212 polymerase active site or the contacting interfaces between adjacent subunits (Figure 2B),  
213 suggesting these substitutions do not affect the inter-subunit interactions for assembly of the  
214 polymerase complex. To test this hypothesis, we measured the binding kinetics between  
215 different subunits of the two viruses by surface plasmon resonance (SPR) assays. Each  
216 interaction pair exhibited similar kinetic features for the two viruses, all with sub-micromolar  
217 range affinities (Figure 5A and B). We also tested the cross-binding between subunits of the  
218 two viruses, which revealed similar affinities for heterologous pairs as compared to the native  
219 homologous interactions (Figure 5C and D).

220 We then compared the thermostability of each component in the polymerase complex of  
221 the two viruses (Figure 6). Consistent with the almost identical sequences, the nsp7 of both  
222 viruses displayed comparable melting behaviors in the circular dichroism (CD) profiles,  
223 demonstrating similar thermostabilities of the two proteins (Figure 6A and D). In contrast, both  
224 the nsp8 and nsp12 subunits of SARS-CoV-2 showed lower melting temperature ( $T_m$ ) values  
225 as compared to the corresponding subunits of SARS-CoV, suggesting the poorer  
226 thermostability of SARS-CoV-2 proteins (Figure 6B, C, E and F).

227 Taken together, the residue substitutions in SARS-CoV-2 nsp12 polymerase subunit and  
228 nsp7-nsp8 cofactors compromise the efficiency of RNA synthesis by the core polymerase  
229 complex and reduce the thermostability of individual protein subunits as compared to the

230 counterparts of SARS-CoV. These changes may indicate the adaptive evolution of SARS-CoV-  
231 2 towards the human hosts with a relatively lower body temperature than bats which are  
232 potentially the natural host of a panel of zoonotic viruses, including both SARS-CoV and  
233 SARS-CoV-2 (O'Shea et al., 2014; Zhou et al., 2020).

234

## 235 **Discussion**

236 The structural information of coronavirus polymerase interaction with cofactors suggests a  
237 common theme of viral RdRp activation despite being executed by different structural  
238 components. The coronavirus polymerase subunit requires multiple cofactors/subunits for  
239 complete transcription and replication functions, similar to the related flaviviruses which also  
240 harbor a positive-sense RNA genome (Aktepe and Mackenzie, 2018; Sevajol et al., 2014;  
241 Ziebuhr, 2005). In contrast, the sNSVs utilize fewer multi-subunit protein components to  
242 accomplish similar processes, which could be activated by RNA segments instead of proteins  
243 (Gerlach et al., 2015; Peng et al., 2020; Pflug et al., 2014). As revealed by the coronavirus core  
244 polymerase structures, it lacks the essential component for unwinding the template-product  
245 hybrid which is required to release the single-strand mRNA and viral genome for protein  
246 expression and virion assembly. In the structure of sNSV polymerases, a lid domain is present  
247 at the intersection region of template and product exit tunnels to force duplex deformation  
248 before leaving the polymerase chamber (Gerlach et al., 2015; Peng et al., 2020; Reich et al.,  
249 2014). The nsp13 subunit has been shown with RNA helicase activity, suggesting its  
250 involvement in RNA synthesis at the post-catalytic stage (Adedeji et al., 2012). Further  
251 investigations are required to understand how this process takes place.

252 Of note, we demonstrate the amino acid substitutions in the polymerase and cofactors of  
253 SARS-CoV-2 lead to obviously reduced activity for RNA synthesis as compared to SARS-CoV  
254 core polymerase complex. Indeed, these observations are based on partial components of the  
255 multiple-subunit holoenzyme for coronavirus replication which also involves proofreading and  
256 capping by other nsp subunits, e.g. the nsp10-nsp14 exonuclease subcomplex, nsp13 RNA 5'-  
257 triphosphatase, and the nsp14 and nsp16 methyltransferases (Sevajol et al., 2014; Ziebuhr,  
258 2005). These steps would also render important determinants for the efficiency and accuracy  
259 of RNA synthesis by coronavirus replication machinery. Thus, the collective behavior of  
260 SARS-CoV-2 polymerase complex in the context of an authentic viral replication cycle still  
261 remains an open question to be further explored. On the other hand, the lower thermostability  
262 of SARS-CoV-2 polymerase subunits indicate its well adaptation for humans which have a  
263 relatively lower body temperature compared to bats, the potential natural host of SARS-CoV-  
264 2 (O'Shea et al., 2014; Zhou et al., 2020). Interestingly, we also found that the closely-related  
265 bat coronavirus RaTG13 showed an extremely high sequence identity of core polymerase  
266 subunits to SARS-CoV-2, in which the nsp7 and nsp8 cofactors are strictly identical and the  
267 nsp12 catalytic subunit harbors only four residue replacements between the two viruses (Figure  
268 S5), suggesting similar enzymatic properties and thermostabilities of their polymerase  
269 components. This observation indicated the RaTG13 coronavirus has been well adapted to  
270 human hosts in terms of viral replication machinery and might further support the probable bat-  
271 origin of SARS-CoV-2 (Zhou et al., 2020).

272 In summary, our structural and biochemical analyses on SARS-CoV-2 core polymerase  
273 complex improve our understanding on the mechanisms of RNA synthesis by different viral

274 RdRps and highlight a common theme for polymerase activation by stabilizing critical catalytic  
275 motifs via diverse means. In addition, the different biochemical properties of polymerase  
276 components of SARS-CoV-2 and SARS-CoV suggest the clues for adaptive evolution of  
277 coronaviruses in favor of human hosts.  
278

279 **Acknowledgements**

280 We thank all staff members in the Center of Biological Imaging (CBI), Institute of Biophysics  
281 (IBP), Chinese Academy of Sciences (CAS), for assistance with data collection. We are grateful  
282 to the Core Facility in Institute of Microbiology, Chinese Academy of Sciences (CAS) for  
283 assistance in SPR experiments. This study was supported by the Strategic Priority Research  
284 Program of CAS (XDB29010000), the National Science and Technology Major Project  
285 (2018ZX10101004), National Key Research and Development Program of China  
286 (2020YFC0845900), the National Natural Science Foundation of China (NSFC) (82041016,  
287 81871658 and 81802010), and a grant from the Bill & Melinda Gates Foundation. M.W. is  
288 supported by the National Science and Technology Major Project (2018ZX09711003) and  
289 National Natural Science Foundation of China (NSFC) (81802007). R.P. is supported by the  
290 Young Elite Scientist Sponsorship Program (YESS) by China Association for Science and  
291 Technology (CAST) (2018QNRC001). Y.S. is also supported by the Excellent Young Scientist  
292 Program and from the NSFC (81622031) and the Youth Innovation Promotion Association of  
293 CAS (2015078).

294

295 **Author contributions**

296 Y.S. conceived the study. Q.P. J.Z., B.Y., M.W., X.W., Y.Sun and Q.W. purified the protein  
297 samples and conducted biochemical studies. Q.P. and R.P. performed cryo-EM analysis. R.P.  
298 and J.Q. built the atomic model. Q.P., R.P., M.W. and Y.S. analyzed the data and wrote the  
299 manuscript. All authors participated in the discussion and manuscript editing. Q.P., R.P., B.Y.  
300 and J.Z. contributed equally to this work.

301

302 **Declaration of Interests**

303 The authors declare no competing interests.

304

305



306 **Figures and legends**

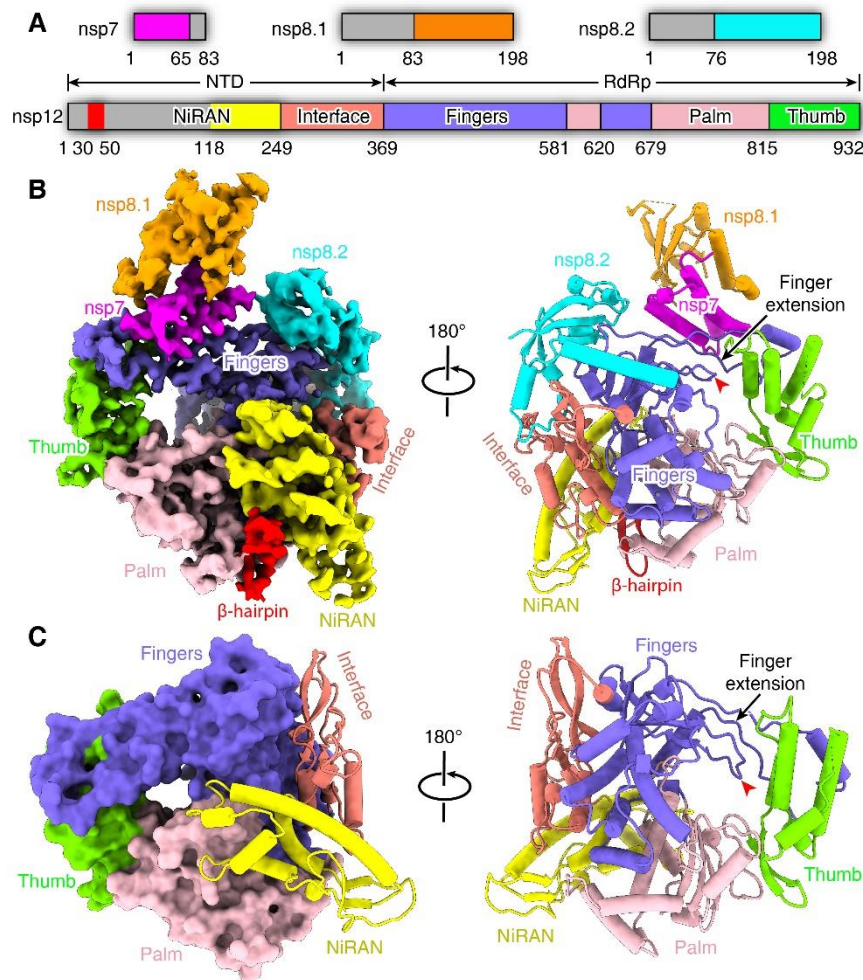

307

308 **Figure 1. Overall structure of SARS-CoV-2 core polymerase complex.** (A) Schematic  
309 diagram of domain architecture for each subunit of polymerase complex. Each domain is  
310 represented by a unique color. The unresolved region is colored in grey. (B) Overall density  
311 map (left) and atomic model (right) of the SARS-CoV-2 nsp12-nsp7-nsp8 core complex at  
312 different views. Both the map and structural model are colored by domains with the same color  
313 code as in (A). The finger-tip loop (one of the key catalytic motifs) is highlighted with a red  
314 arrowhead, and the associated finger extension loops are indicated by a black arrow. (C) The  
315 structure of nsp12 polymerase subunit in different views, colored by domains with the same  
316 scheme as in (A).

317 **See also Figures S1-S3 and Table S1.**

318

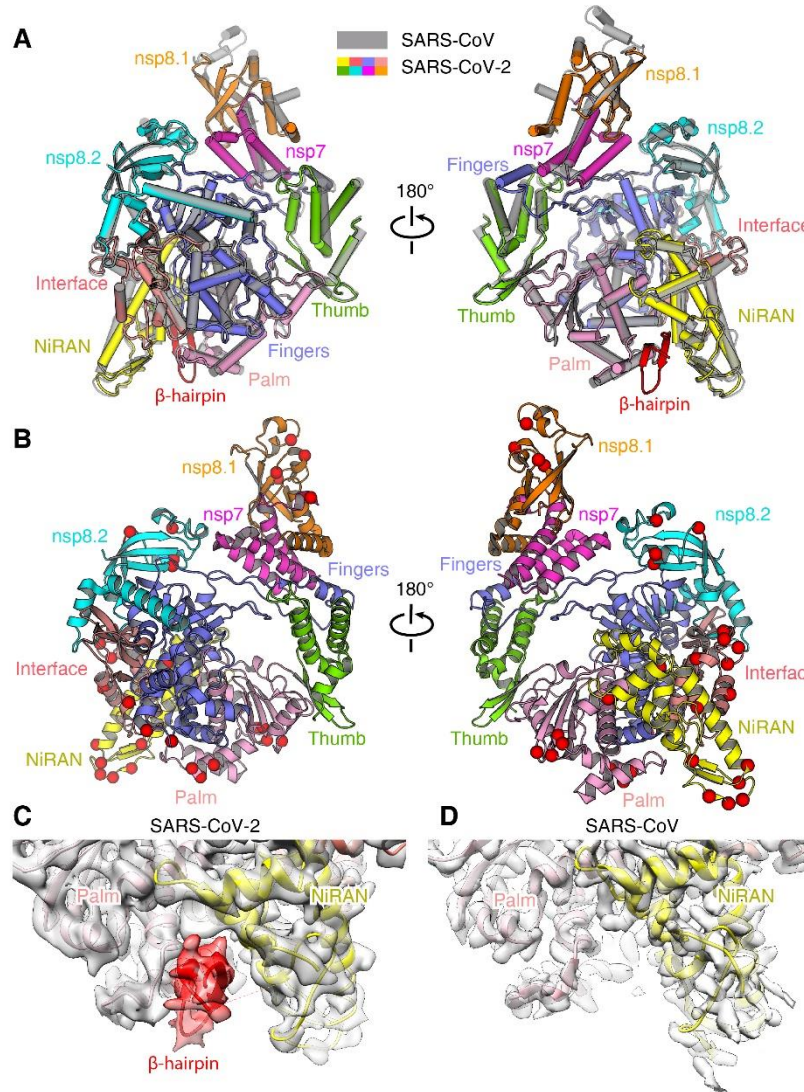

319

320 **Figure 2. Structural comparison of SARS-CoV-2 and SARS-CoV core polymerase**

321 **complexes.** (A) Overlay of the nsp12-nsp7-nsp8 complexes of SARS-CoV-2 (colored by

322 domains) and SARS-CoV (grey). The two structures could be well superimposed with high

323 similarity. (B) Residue substitutions between SARS-CoV-2 and SARS-CoV core polymerase

324 complexes. The structural model is shown in cartoons and colored by domains. The substitution

325 sites are represented by red spheres to highlight their locations. (C-D) Comparison of nsp12 N-

326 terminal densities in SARS-CoV-2 (C) and SARS-CoV (D) polymerase complexes. The density

327 for the newly identified N-terminal  $\beta$ -hairpin of SARS-CoV-2 nsp12 subunit is highlighted in

328 red. No corresponding density was observed in the reconstruction for SARS-CoV polymerase

329 complex.

330 **See also Figure S4.**

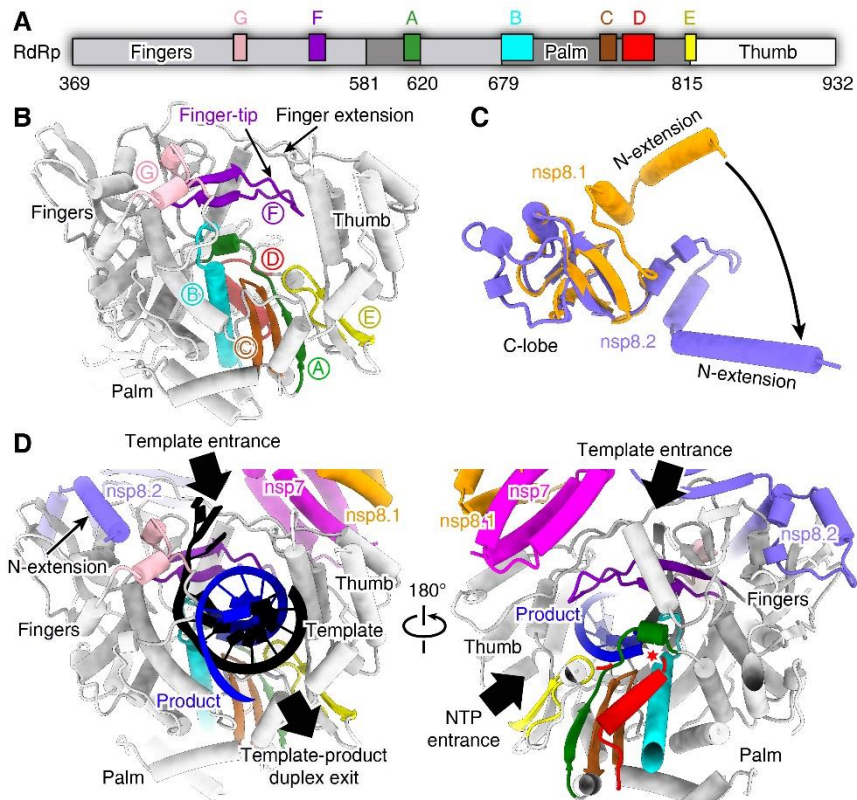

331

332 **Figure 3. Catalytic center of nsp12 RdRp and the interactions with nsp7-nsp8 cofactors.**

333 (A) Schematic diagram of domain organization of SARS-CoV-2 nsp12 RdRp region. The RdRp  
334 domain consists of fingers, palm and thumb subdomains. The seven conserved catalytic motifs  
335 are indicated by different colors in corresponding locations. (B) Atomic structure of nsp12  
336 shown in cartoons with the seven catalytic motifs colored differently as in (A). (C) Structural  
337 comparison of the two nsp8 subunits in the complex. The C-terminal lobe could be well  
338 superimposed, while the N-terminal extension helix shows different conformations. (D)  
339 Structural model for RNA synthesis by coronavirus polymerase complex. The template (black)  
340 and product (blue) strands are modeled based on the elongation complex of poliovirus  
341 polymerase (PDB ID: 3OL8). The template and NTP entrance, and the template-product duplex  
342 exit tunnels are indicated by black arrows. The conserved RdRp catalytic motifs are colored  
343 with the same scheme as in (A). The catalytic site is highlighted with a red star.

344 **See also Figures S4 and S5.**

345

346

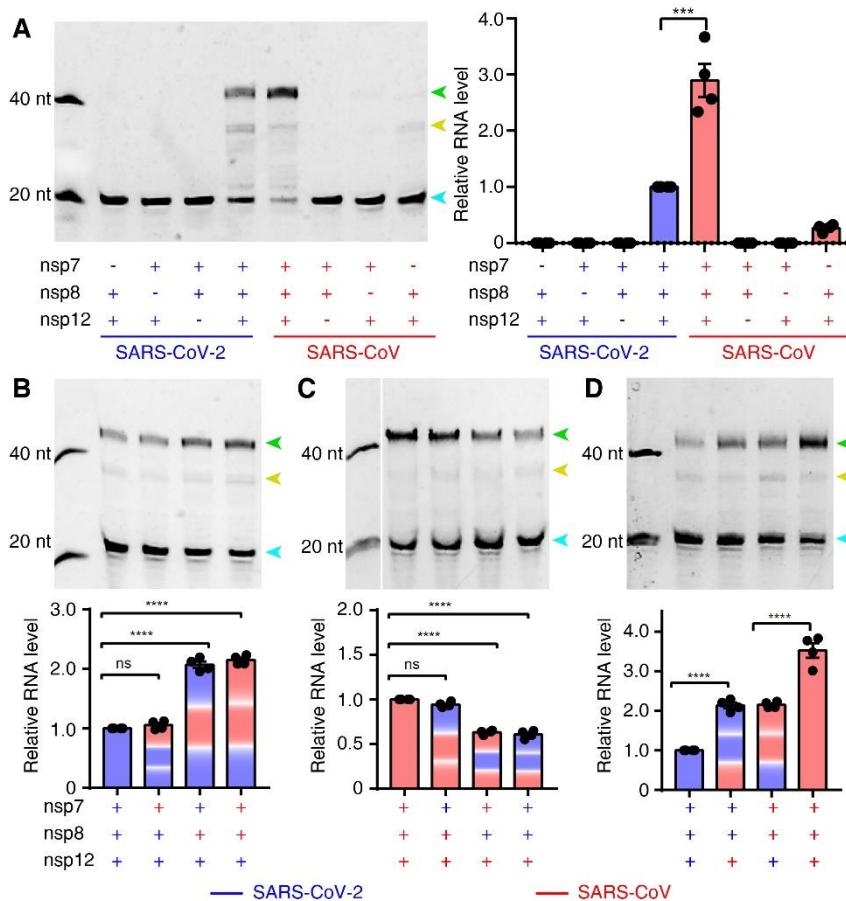

347

348 **Figure 4. *In vitro* polymerase activity of nsp12 and regulatory effects of cofactors. (A)**

349 Comparison of RNA synthesis activities of SARS-CoV-2 and SARS-CoV core polymerase

350 complex. The efficient activity of nsp12 polymerase requires the presence of both nsp7 and

351 nsp8 cofactors. Apart from the fully elongated product (green arrowhead), some aberrant

352 termination products were also observed (yellow arrowhead). The excess primer band is

353 indicated by a cyan arrowhead. **(B, C)** Comparison of the regulatory effects of nsp7 and nsp8

354 cofactors in the context of SARS-CoV-2 **(B)** and SARS-CoV **(C)** nsp12 polymerase,

355 respectively. **(D)** Comparison of the activity of nsp12 polymerase of different viruses in the

356 same context of cofactors. The polymerase activity was quantified by integrating the intensity

357 of the fully elongated product bands and the significance of difference was tested by one-way

358 ANOVA based on the results of four independent experiments (n=4) using different protein

359 preparations. \*,  $P < 0.05$ ; \*\*,  $P < 0.01$ ; \*\*\*,  $P < 0.001$ ; \*\*\*\*,  $P < 0.0001$ .

360 **See also Figure S4.**

361

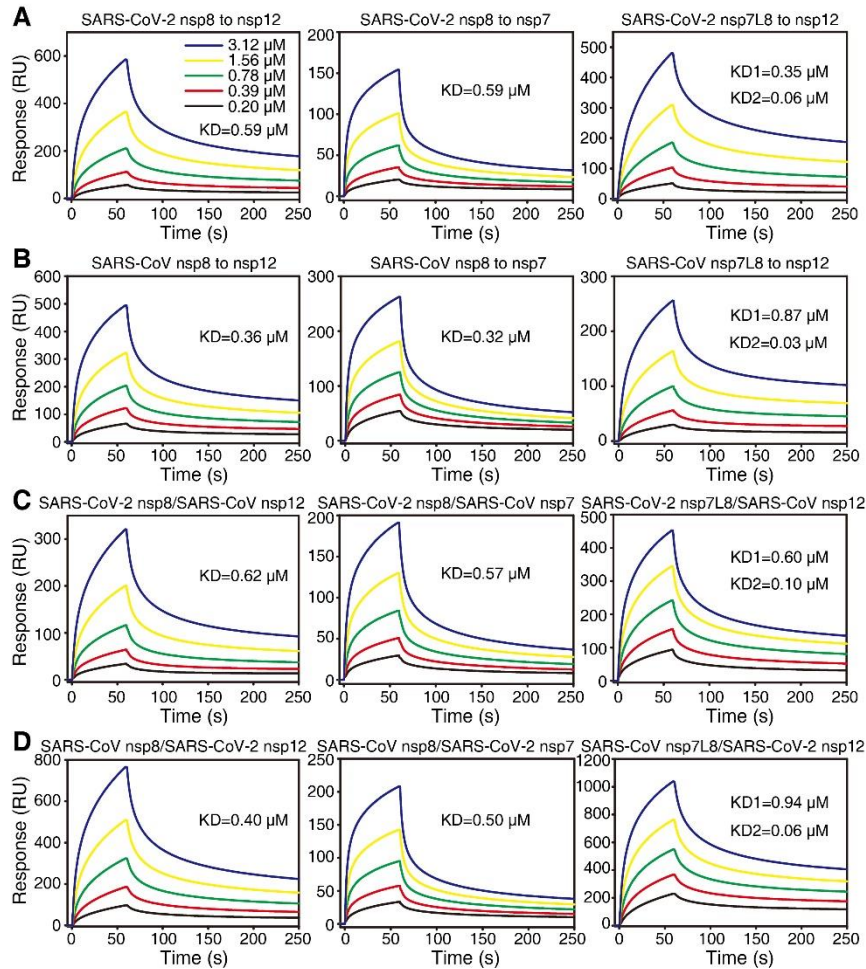

362

363 **Figure 5. SPR binding kinetics of protein pairs in the polymerase complex of SARS-CoV-**

364 **2 and SARS-CoV. (A, B) The binding profiles of homologous protein subunits of SARS-CoV-**

365 **2 (A) and SARS-CoV (B), respectively. (C, D) The cross-binding kinetics between protein**

366 **subunits of the two viruses. All analytes were measured with serial-diluted concentrations as**

367 **shown in (A). The title is presented as analyte/immobilized ligand to facilitate comparison. The**

368 **binding between nsp12 and nsp7L8 fusion protein was fitted with the heterogeneous binding**

369 **mode as the nsp7-nsp8 heterodimer exhibited non-uniform conformations in solution (Zhai et**

370 **al., 2005). It can occupy either cofactor binding site as stable nsp7-nsp8 complex or free nsp8**

371 **once the nsp7 detach from the heterodimer. Both equilibrium binding constant values (KD1 and**

372 **KD2) were calculated in this mode. The data shown is a representative result of three**

373 **independent experiments using different protein preparations, all of which produced similar**

374 **results.**

375 **See also Figure S4.**

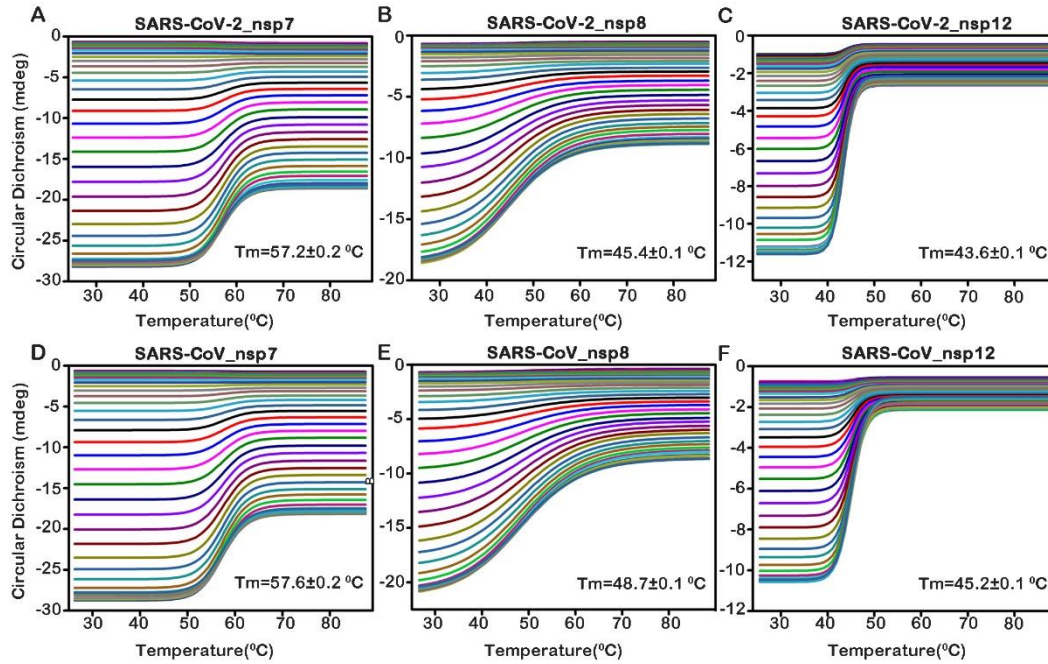

376

377 **Figure 6. CD profiles of individual subunits in the core polymerase complex.** The multi-  
378 wavelength (215-260 nm) CD spectra of SARS-CoV-2 (A-C) and SARS-CoV (D-F)  
379 polymerase components at different temperatures. The T<sub>m</sub> values were calculated to evaluate  
380 the thermostability of each protein subunit. The data shown are representative results of two  
381 independent experiments using different protein preparations.

382 **See also Figure S4.**

383

384 **STAR Methods**

385 **Plasmids, bacterial strains and cell lines**

386 The nsp12 polymerase subunit of both SARS-CoV and SARS-CoV-2 were cloned into the  
387 pFastbac-1 vector and expressed in the High Five insect cell line. The nsp7, nsp8 and nsp7L8  
388 fusion protein were incorporated into the pET-21a plasmid and expressed in *E. Coli* BL21 (DE3)  
389 strain.

390

391 **Protein expression and purification**

392 The codon-optimized sequences of nsp7 and nsp8 were synthesized with N-terminal  
393 6×histidine tag and inserted into pET-21a vector for expression in *E. coli* (Synbio Tec, Suzhou,  
394 China). For the nsp7L8 fusion protein, the sequence was also codon-optimized for *E. Coli*  
395 expression system and a 6×histidine linker was introduced between the nsp7 and nsp8 subunits  
396 (Genewiz Tec, Suzhou, China). Protein production was induced with 1 mM isopropylthio-  
397 galactoside (IPTG) and incubated for 14-16 hours at 16 °C. Bacterial cells were harvested by  
398 centrifugations (12,000 rpm, 10 min), resuspended in buffer A (20 mM HEPES, 500 mM NaCl,  
399 2 mM Tris (2-carboxyethyl) phosphine (TCEP), pH 7.5, and lysed by sonication. Cell debris  
400 were removed via centrifugation (12,000 rpm, 1h) and filtration with a 0.22 µm cut-off filter.  
401 The supernatant was loaded onto a HisTrap column (GE Healthcare) for initial affinity  
402 purification. The target proteins were eluted using buffer A supplemented with 300 mM  
403 imidazole. Fractions were pooled and subjected to size-exclusion chromatography (SEC) with  
404 a Superdex 200 increase column (GE Healthcare). The final product was concentrated and  
405 stored at -80 °C.

406 For nsp12 proteins, the genes were codon-optimized for *Spodoptera frugiperda*  
407 incorporated into the pFastBac-1 plasmid with a C-terminal thrombin proteolysis site, a 6×  
408 histidine and two tandem Strep tags. Proteins were expressed with High Five cells at 27 °C for  
409 48 h post infection. Cells were collected by centrifugation (3,000 rpm, 10 min) and resuspended  
410 in buffer B (25 mM HEPES, 300 mM NaCl, 1 mM MgCl<sub>2</sub>, and 2mM TCEP, pH 7.4. The cell  
411 suspension was lysed by sonication and the lysate was clarified using ultracentrifugation  
412 (30,000 rpm, 2 h) and filtered with 0.22 µm cut-off members. The resulting supernatant was  
413 applied to a StrepTrap column (GE Healthcare) to capture the target proteins. The bound  
414 proteins were eluted with buffer B supplemented with 2.5 mM desthiobiotin. Target fractions  
415 were pooled and subjected to further purification by SEC using a Superdex 200 increase column  
416 (GE Healthcare). The final product was concentrated and stored at -80 °C before use.

417

#### 418 **Cryo-EM sample preparation and data collection**

419 An aliquot of 3 µL protein solution (0.6 mg/mL) was applied to a glow-discharged Quantifoil  
420 1.2/1.3 holey carbon grid and blotted for 2.5 s in a humidity of 100% before plunge-freezing  
421 with an FEI Vitrobot Mark IV. Cryo-samples were screened using an FEI Tecnai TF20 electron  
422 microscope and transferred to an FEI Talos Arctica operated at 200 kV for data collection. The  
423 microscope was equipped with a post-column Bioquantum energy filter (Gatan) which was  
424 used with a slit width of 20 eV. The data was automatically collected using SerialEM software  
425 (<http://bio3d.colorado.edu/SerialEM/>). Images were recorded with a Gatan K2-summit camera  
426 in super-resolution counting mode with a calibrated pixel size of 0.8 Å at the specimen level.  
427 Each exposure was performed with a dose rate of 10 e<sup>-</sup>/pixel/s (approximately 15.6 e<sup>-</sup>/Å<sup>2</sup>/s) and



428 lasted for 3.9 s, resulting in an accumulative dose of  $\sim 60 \text{ e}^-/\text{\AA}^2$  which was fractionated into 30  
429 movie-frames. The final defocus range of the dataset was approximately -1.4 to -3.4  $\mu\text{m}$ .

430

### 431 **Image processing**

432 The image drift and anisotropic magnification was corrected using MotionCor2 (Zheng et al.,  
433 2017). Initial contrast transfer function (CTF) values were estimated with CTFFIND4.1 (Rohou  
434 and Grigorieff, 2015) at the micrograph level. Images with an estimated resolution limit worse  
435 than 5  $\text{\AA}$  were discarded. Particles were automatically picked with RELION-3.0 (Zivanov et al.,  
436 2018) following the standard protocol. In total, approximately 1,860,000 particles were picked  
437 from  $\sim 4,200$  micrographs. After 3 rounds of extensive 2D classification,  $\sim 924,000$  particles  
438 were selected for 3D classification with the density map of SARS-CoV nsp12-nsp7-nsp8  
439 complex (EMDB-0520) as the reference which was low-pass filtered to 60  $\text{\AA}$  resolution. After  
440 two rounds of 3D classification, a clean subset of  $\sim 101,000$  particles was identified, which  
441 displayed clear features of secondary structural elements. These particles were subjected to 3D  
442 refinement supplemented with per-particle CTF refinement and dose-weighting, which led to a  
443 reconstruction of 3.65  $\text{\AA}$  resolution estimated by the gold-standard Fourier shell correlation  
444 (FSC) 0.143 cut-off value. The local resolution distribution of the final density map was  
445 calculated with ResMap (Kucukelbir et al., 2014).

446

### 447 **Model building and refinement**

448 The structure of SARS-CoV nsp12-nsp7-nsp8 complex (PDB ID: 6NUR) was rigidly docked  
449 into the density map using CHIMERA (Pettersen et al., 2004). The model was manually

450 corrected for local fit in COOT (Emsley et al., 2010) and the sequence register was corrected  
451 based on alignment. The initial model was refined in real space using PHENIX (Adams et al.,  
452 2010) with the secondary structural restraints and Ramachandran restrains applied. The model  
453 was further adjusted and refined iteratively for several rounds aided by the stereochemical  
454 quality assessment using MolProbity (Chen et al., 2010). The representative density and atomic  
455 models are shown in Figure. S3. The statistics for image processing and model refinement are  
456 summarized in the Table S1. Structural figures were rendered by either CHIMERA (Pettersen  
457 et al., 2004) or PyMOL (<https://pymol.org/>).

458

#### 459 ***In vitro* polymerase activity assay**

460 The activity of SARS-CoV-2 polymerase complex was tested as previously described for  
461 SARS-CoV nsp12 with slight modifications. Briefly, a 40-nt template RNA (5'-  
462 CUAUCCCAUGUGAUUUUAAUAGCUUCUUAGGAGAAUGAC-3', Takara)  
463 corresponding to the 3' end of the SARS-CoV-2 genome was annealed to a complementary 20-  
464 nt primer containing a 5'-fluorescein label (5'-FAM- GUCAUUCUCCUAAGAAGCUA-3',  
465 Takara). To perform the primer extension assay, 1  $\mu$ M nsp12, nsp7 and nsp8 were incubated for  
466 30 min at 30 °C with 1  $\mu$ M annealed RNA and 0.5 mM NTP in a reaction buffer containing 10  
467 mM Tris-HCl (pH 8.0), 10 mM KCl, 1 mM beta-mercaptoethanol and 2 mM MgCl<sub>2</sub> (freshly  
468 added prior usage). The products were denatured by boiling (100 °C, 10 min) in the presence  
469 of formamide and separated by 20% PAGE containing 9 M urea run with 0.5×TBE buffer.  
470 Images were taken using a Vilber Fusion system and analyzed with the Image J software.

471

472 **SPR assay**

473 The affinities between nsp12, nsp7 and nsp8 or nsp7L8 proteins were measured at room  
474 temperature (r.t.) using a Biacore 8K system with CM5 chips (GE Healthcare). The nsp12  
475 protein was immobilized on the chip with a concentration of 100  $\mu\text{g}/\text{mL}$  (diluted by 0.1 mM  
476 NaAc, pH 4.0), and the nsp7 protein was immobilized with a concentration of 50  $\mu\text{g}/\text{mL}$  (diluted  
477 by 0.1 mM NaAc, pH 4.5). For all measurements, the same running buffer was used which  
478 consists of 20 mM HEPES, pH 7.5, 150 mM NaCl and 0.005% tween-20. Proteins were pre-  
479 exchanged into the running buffer by SEC prior to loading to the system. A blank channel of  
480 the chip was used as the negative control. Serially diluted protein solutions were then flowed  
481 through the chip surface. The Multi-cycle binding kinetics was analyzed with the Biacore 8K  
482 Evaluation Software (version 1.1.1.7442) and fitted with a two-state reaction binding model (for  
483 ligand nsp8) or heterogeneous ligand binding model (for ligand nsp7L8).

484

485 **Circular dichroism (CD) measurement**

486 The thermostability of nsp12, nsp7 and nsp8 were tested by measuring the CD spectra of each  
487 protein at different temperatures. The multi-wavelength (215-260 nm) CD spectra of each  
488 protein were recorded with a Chirascan spectrometer (Applied Photophysics) using a  
489 thermostatically controlled cuvette at rising temperatures from 25 to 99  $^{\circ}\text{C}$  with 0.5  $^{\circ}\text{C}$  intervals  
490 and an elevating rate of 1  $^{\circ}\text{C}/\text{min}$ . The data was analyzed using Global3 software and the  $T_m$   
491 values were calculated for each sample.

492

493 **Data availability**

494 The cryo-EM density map and atomic coordinates have been deposited to the Electron  
495 Microscopy Data Bank (EMDB) and the Protein Data Bank (PDB) with the accession codes  
496 EMD-30226 and 7BW4, respectively. All other data are available from the authors on  
497 reasonable request.  
498

499 **Supplemental Information**

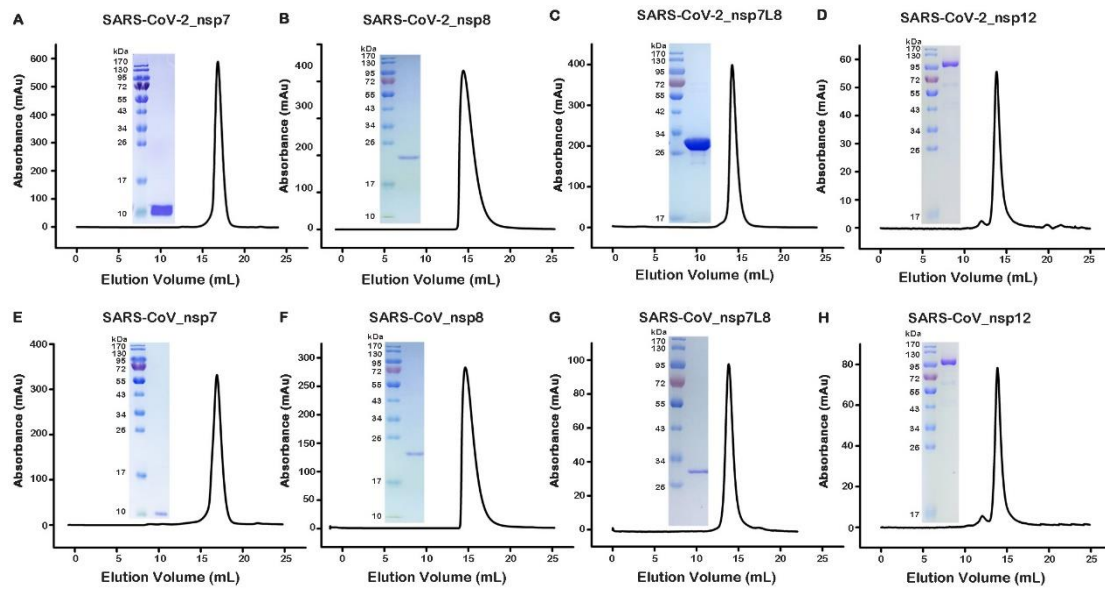

500

501 **Figure S1. Purification of nsp12 polymerase and nsp7-nsp8 cofactors.** Size-exclusion  
502 chromatography and SDS-PAGE profiles of the nsp7 (**A, E**), nsp8 (**B, F**), nsp7L8 (ns7-nsp8  
503 heterodimer) (**C, G**) and nsp12 (**D, H**) proteins of SARS-CoV-2 and SARS-CoV. All these  
504 protein samples showed good behaviors in solution with high homogeneity and purity.

505 **Related to Figure 1.**

506

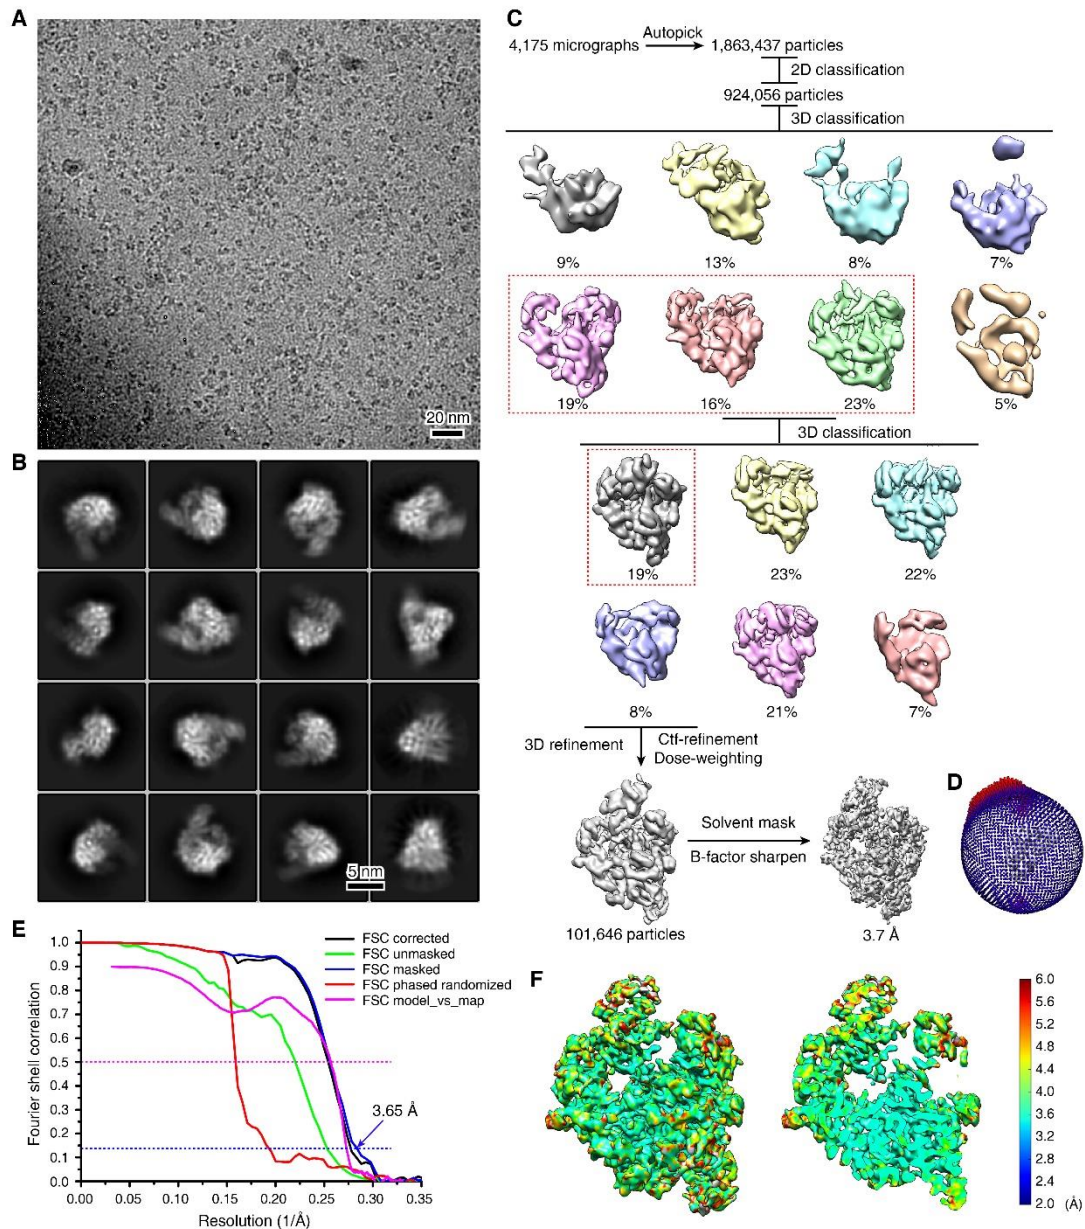

507

508 **Figure S2. Cryo-EM analysis of SARS-CoV-2 core polymerase complex.** (A) A  
 509 representative micrograph of SARS-CoV-2 nsp12-nsp7-nsp8 complex (out of >4,000  
 510 micrographs). (B) Typical 2D class average images. Three rounds of 2D classification were  
 511 performed. (C) Image processing workflow. The selected classes for next-step processing are  
 512 indicated by red dashed boxes. (D) Euler angle distribution of the final reconstruction. (E) FSC  
 513 curves for evaluating the resolution of final reconstruction and model-map correlations. (F)  
 514 Local resolution assessment of the final density map.

515 **Related to Figure 1.**

516

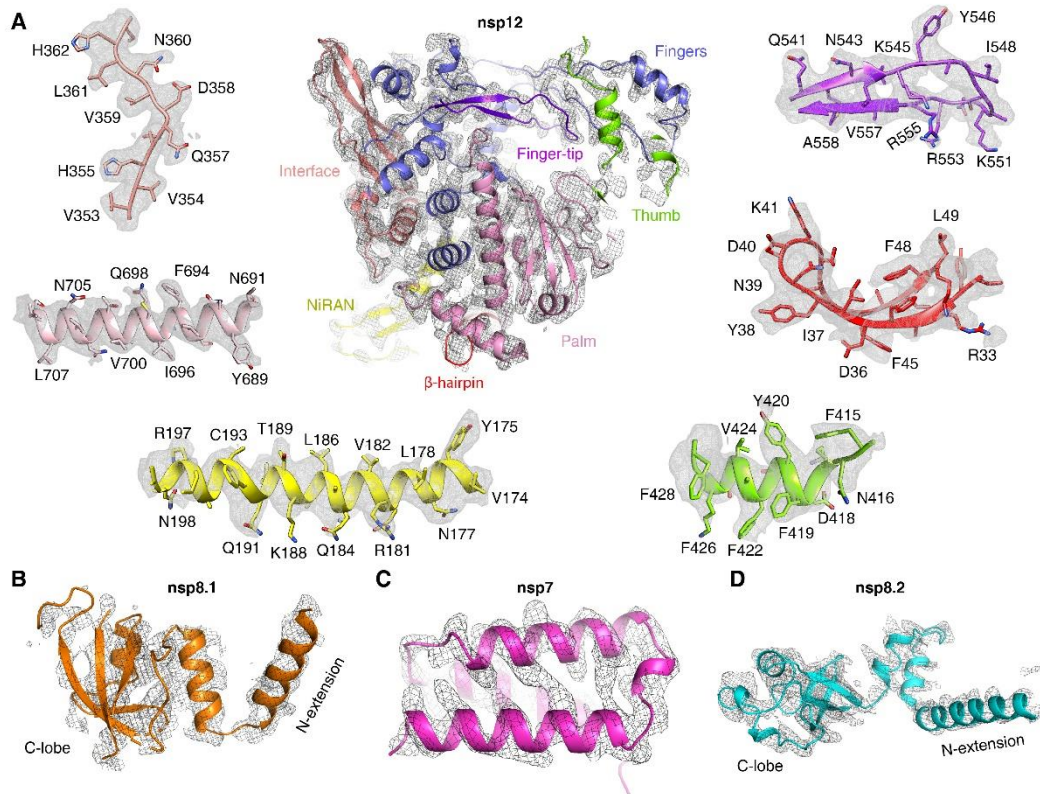

517

518 **Figure S3. Representative density and atomic models of individual polymerase**  
519 **components. (A)** Overall density and atomic model of the nsp12 subunit and the close-up views  
520 in selected regions. Most bulky side chains could be clearly resolved in the density map. **(B-D)**  
521 The density maps for nsp7 and nsp8 individual cofactor subunits.

522 **Related to Figure 1.**

523

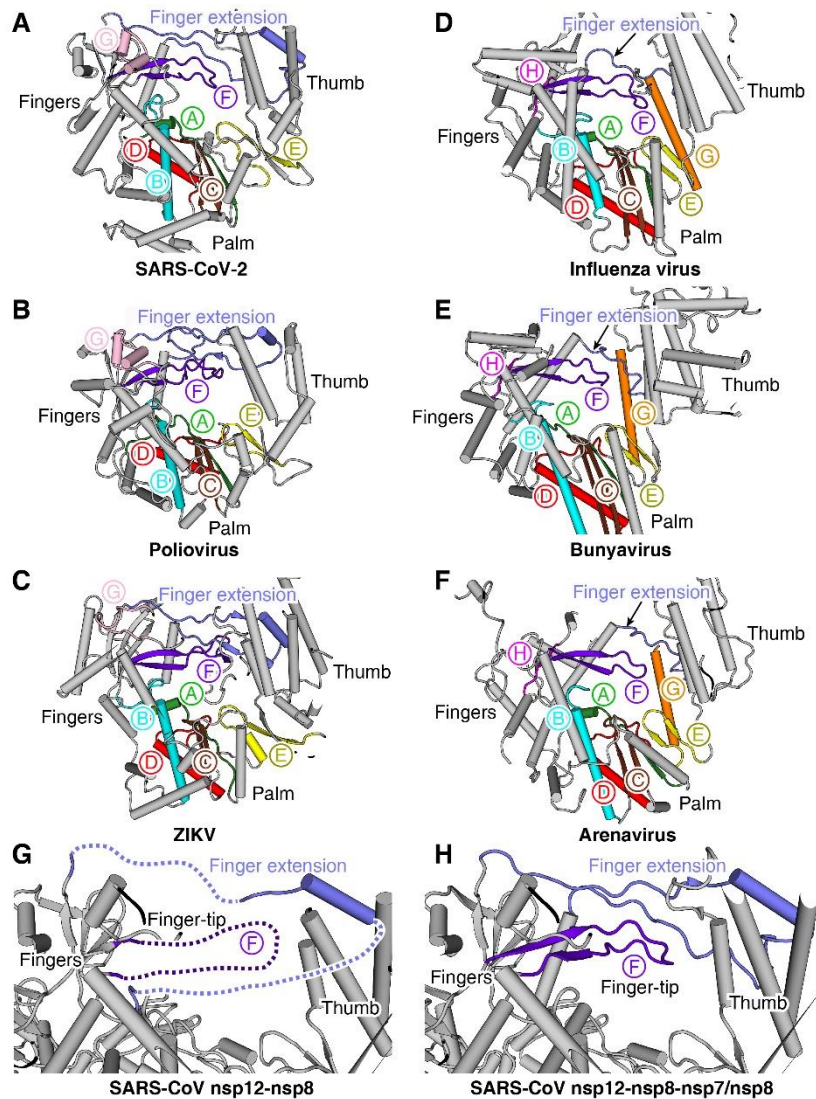

524

525 **Figure S4. Structural comparison of different viral RdRps.** (A-F) Comparison of catalytic  
526 motifs in different viral RdRps. The SARS-CoV-2, poliovirus (PDB ID: 3OL8) and ZIKV (PDB  
527 ID: 5WZ3) belong to positive-sense RNA virus group. The influenza virus (PDB ID: 4WRT),  
528 bunyavirus (exemplified by the La Crosse orthobunyavirus, LACV; PDB ID: 5AMQ) and  
529 arenavirus (exemplified by the Lassa virus, LASV; PDB ID: 6KLC) (F) belong to sNSV group.  
530 Each catalytic motif is represented by a unique color. The finger extension is highlighted with  
531 a black arrow in each structure. (G, H) The structures of SARS-CoV nsp12 polymerase with  
532 (H) or without (G) nsp7-nsp8 heterodimer binding. The finger-tip (motif F) and finger  
533 extension loops are disordered on their own, which are significantly stabilized by nsp7-nsp8  
534 cofactors binding.

535 **Related to Figures 2-6.**

536



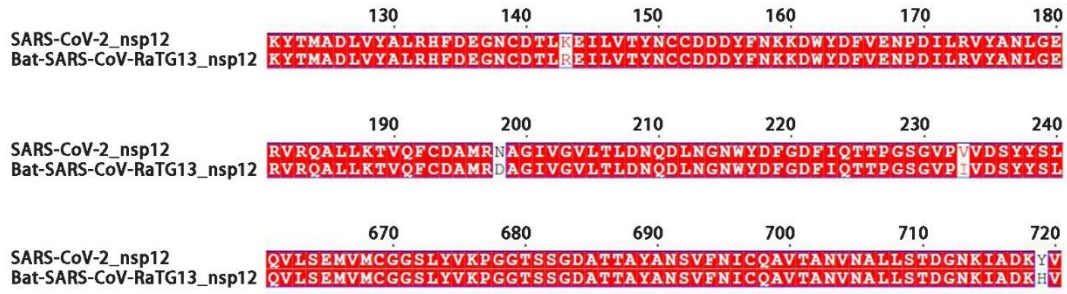

537

538 **Figure S5. Sequence alignment of nsp12 polymerase subunit in selected regions of SARS-**

539 **CoV-2 and RaTG13 bat coronavirus.** The four residue substitutions between the two proteins

540 are highlighted by white background.

541 **Related to Figure 6.**

542

543 **Table S1. Cryo-EM data processing and refinement statistics.**

| SARS-CoV-2 nsp12-nsp7-nsp8 complex                  |              |
|-----------------------------------------------------|--------------|
| <b>Data collection and processing</b>               |              |
| Magnification                                       | 62,500       |
| Voltage (kV)                                        | 200          |
| Electron exposure (e <sup>-</sup> /Å <sup>2</sup> ) | 60           |
| Defocus range (µm)                                  | -1.4 to -3.4 |
| Pixel size (Å)                                      | 0.8          |
| Symmetry imposed                                    | C1           |
| Final particle images (no.)                         | 101,646      |
| Map resolution (Å)                                  | 3.65         |
| FSC threshold                                       | 0.143        |
| Map resolution range (Å)                            | 3.0-6.0      |
| <b>Refinement</b>                                   |              |
| Initial model used (PDB code)                       | 6NUR         |
| Model resolution range (Å)                          | Up to 3.7    |
| Map sharpening <i>B</i> factor (Å <sup>2</sup> )    | -135         |
| Map correlation coefficient                         |              |
| Whole unit cell                                     | 0.77         |
| Around atoms                                        | 0.77         |
| Model composition                                   |              |
| Non-hydrogen atoms                                  | 8,595        |
| Protein residues                                    | 1,078        |
| <i>B</i> factors (Å <sup>2</sup> )                  |              |
| Protein                                             | 89           |
| Ligand                                              | 74           |
| R.m.s. deviations                                   |              |
| Bond lengths (Å)                                    | 0.004        |
| Bond angles (°)                                     | 0.65         |
| <b>Validation</b>                                   |              |
| MolProbity score                                    | 2.21         |
| Clashscore                                          | 15.73        |
| Poor rotamers (%)                                   | 1.68         |
| Ramachandran plot                                   |              |
| Favored (%)                                         | 95.28        |
| Allowed (%)                                         | 4.53         |
| Disallowed (%)                                      | 0.19         |

544

545 **Related to Figure 1.**

546

547 **References**

- 548 Adams, P.D., Afonine, P.V., Bunkoczi, G., Chen, V.B., Davis, I.W., Echols, N., Headd, J.J.,  
549 Hung, L.W., Kapral, G.J., Grosse-Kunstleve, R.W., *et al.* (2010). PHENIX: a comprehensive  
550 Python-based system for macromolecular structure solution. *Acta. Crystallogr. D Biol.*  
551 *Crystallogr.* *66*, 213-221.
- 552 Adedeji, A.O., Marchand, B., Te Velthuis, A.J., Snijder, E.J., Weiss, S., Eoff, R.L., Singh, K.,  
553 and Sarafianos, S.G. (2012). Mechanism of nucleic acid unwinding by SARS-CoV helicase.  
554 *PLoS One* *7*, e36521.
- 555 Ahn, D.G., Choi, J.K., Taylor, D.R., and Oh, J.W. (2012). Biochemical characterization of a  
556 recombinant SARS coronavirus nsp12 RNA-dependent RNA polymerase capable of copying  
557 viral RNA templates. *Arch. Virol.* *157*, 2095-2104.
- 558 Aktepe, T.E., and Mackenzie, J.M. (2018). Shaping the flavivirus replication complex: It is  
559 curvaceous! *Cell. Microbiol.* *20*, e12884.
- 560 Andersen, K.G., Rambaut, A., Lipkin, W.I., Holmes, E.C., and Garry, R.F. (2020). The proximal  
561 origin of SARS-CoV-2. *Nat. Med.* <https://doi.org/10.1038/s41591-020-0820-9>.
- 562 Chen, V.B., Arendall, W.B., 3rd, Headd, J.J., Keedy, D.A., Immormino, R.M., Kapral, G.J.,  
563 Murray, L.W., Richardson, J.S., and Richardson, D.C. (2010). MolProbity: all-atom structure  
564 validation for macromolecular crystallography. *Acta. Crystallogr. D Biol. Crystallogr.* *66*, 12-  
565 21.
- 566 Coronaviridae Study Group of the International Committee on Taxonomy of, V. (2020). The  
567 species Severe acute respiratory syndrome-related coronavirus: classifying 2019-nCoV and  
568 naming it SARS-CoV-2. *Nat. Microbiol.* *5*, 536-544.

569 Duan, W., Song, H., Wang, H., Chai, Y., Su, C., Qi, J., Shi, Y., and Gao, G.F. (2017). The crystal  
570 structure of Zika virus NS5 reveals conserved drug targets. *EMBO J.* *36*, 919-933.

571 Emsley, P., Lohkamp, B., Scott, W.G., and Cowtan, K. (2010). Features and development of  
572 Coot. *Acta. Crystallogr. D Biol. Crystallogr.* *66*, 486-501.

573 Gao, Y., Yan, L., Huang, Y., Liu, F., Zhao, Y., Cao, L., Wang, T., Sun, Q., Ming, Z., Zhang, L.,  
574 *et al.* (2020). Structure of the RNA-dependent RNA polymerase from COVID-19 virus. *Science*.  
575 DOI: 10.1126/science.abb7498.

576 Gerlach, P., Malet, H., Cusack, S., and Reguera, J. (2015). Structural insights into bunyavirus  
577 replication and its regulation by the vRNA promoter. *Cell* *161*, 1267-1279.

578 Godoy, A.S., Lima, G.M., Oliveira, K.I., Torres, N.U., Maluf, F.V., Guido, R.V., and Oliva, G.  
579 (2017). Crystal structure of Zika virus NS5 RNA-dependent RNA polymerase. *Nat. Commun.*  
580 *8*, 14764.

581 Gong, P., and Peersen, O.B. (2010). Structural basis for active site closure by the poliovirus  
582 RNA-dependent RNA polymerase. *Proc. Natl. Acad. Sci. USA.* *107*, 22505-22510.

583 Hengrung, N., El Omari, K., Serna Martin, I., Vreede, F.T., Cusack, S., Rambo, R.P., Vornrhein,  
584 C., Bricogne, G., Stuart, D.I., Grimes, J.M., *et al.* (2015). Crystal structure of the RNA-  
585 dependent RNA polymerase from influenza C virus. *Nature* *527*, 114-117.

586 Holshue, M.L., DeBolt, C., Lindquist, S., Lofy, K.H., Wiesman, J., Bruce, H., Spitters, C.,  
587 Ericson, K., Wilkerson, S., Tural, A., *et al.* (2020). First case of 2019 novel coronavirus in the  
588 United States. *N. Engl. J. Med.* *382*, 929-936.

589 Huang, C., Wang, Y., Li, X., Ren, L., Zhao, J., Hu, Y., Zhang, L., Fan, G., Xu, J., Gu, X., *et al.*  
590 (2020). Clinical features of patients infected with 2019 novel coronavirus in Wuhan, China.

591 Lancet 395, 497-506.

592 Kim, J.Y., Choe, P.G., Oh, Y., Oh, K.J., Kim, J., Park, S.J., Park, J.H., Na, H.K., and Oh, M.D.

593 (2020). The first case of 2019 novel coronavirus pneumonia imported into Korea from Wuhan,

594 China: implication for infection prevention and control measures. *J. Korean Med. Sci.* 35, e61.

595 Kirchdoerfer, R.N., and Ward, A.B. (2019). Structure of the SARS-CoV nsp12 polymerase

596 bound to nsp7 and nsp8 co-factors. *Nat. Commun.* 10, 2342.

597 Kucukelbir, A., Sigworth, F.J., and Tagare, H.D. (2014). Quantifying the local resolution of

598 cryo-EM density maps. *Nat. Methods* 11, 63-65.

599 Lehmann, K.C., Gulyaeva, A., Zevenhoven-Dobbe, J.C., Janssen, G.M.C., Ruben, M.,

600 Overkleeft, H.S., van Veelen, P.A., Samborskiy, D.V., Kravchenko, A.A., Leontovich, A.M., *et*

601 *al.* (2015). Discovery of an essential nucleotidylating activity associated with a newly

602 delineated conserved domain in the RNA polymerase-containing protein of all nidoviruses.

603 *Nucleic Acids Res.* 43, 8416-8434.

604 Lu, R., Zhao, X., Li, J., Niu, P., Yang, B., Wu, H., Wang, W., Song, H., Huang, B., Zhu, N., *et*

605 *al.* (2020). Genomic characterisation and epidemiology of 2019 novel coronavirus: implications

606 for virus origins and receptor binding. *Lancet* 395, 565-574.

607 O'Shea, T.J., Cryan, P.M., Cunningham, A.A., Fooks, A.R., Hayman, D.T.S., Luis, A.D., Peel,

608 A.J., Plowright, R.K., and Wood, J.L.N. (2014). Bat flight and zoonotic viruses. *Emerg. Infect.*

609 *Dis.* 20, 741-745.

610 Peng, R.C., Xu, X., Jing, J.M., Wang, M., Peng, Q., Liu, S., Wu, Y., Bao, X.C., Wang, P.Y., Qi,

611 J.X., *et al.* (2020). Structural insight into arenavirus replication machinery. *Nature* 579, 615–

612 619.

613 Pettersen, E.F., Goddard, T.D., Huang, C.C., Couch, G.S., Greenblatt, D.M., Meng, E.C., and  
614 Ferrin, T.E. (2004). UCSF Chimera--a visualization system for exploratory research and  
615 analysis. *J. Comput. Chem.* *25*, 1605-1612.

616 Pflug, A., Guilligay, D., Reich, S., and Cusack, S. (2014). Structure of influenza A polymerase  
617 bound to the viral RNA promoter. *Nature* *516*, 355-360.

618 Reich, S., Guilligay, D., Pflug, A., Malet, H., Berger, I., Crepin, T., Hart, D., Lunardi, T., Nanao,  
619 M., Ruigrok, R.W.H., *et al.* (2014). Structural insight into cap-snatching and RNA synthesis by  
620 influenza polymerase. *Nature* *516*, 361-366.

621 Rohou, A., and Grigorieff, N. (2015). CTFIND4: Fast and accurate defocus estimation from  
622 electron micrographs. *J. Struct. Biol.* *192*, 216-221.

623 Rothe, C., Schunk, M., Sothmann, P., Bretzel, G., Froeschl, G., Wallrauch, C., Zimmer, T., Thiel,  
624 V., Janke, C., Guggemos, W., *et al.* (2020). Transmission of 2019-nCoV infection from an  
625 asymptomatic contact in Germany. *N. Engl. J. Med.* *382*, 970-971.

626 Sevajol, M., Subissi, L., Decroly, E., Canard, B., and Imbert, I. (2014). Insights into RNA  
627 synthesis, capping, and proofreading mechanisms of SARS-coronavirus. *Virus Res.* *194*, 90-99.

628 Shi, F., Xie, Y., Shi, L., and Xu, W. (2013). Viral RNA polymerase: a promising antiviral target  
629 for influenza A virus. *Curr. Med. Chem.* *20*, 3923-3934.

630 Subissi, L., Posthuma, C.C., Collet, A., Zevenhoven-Dobbe, J.C., Gorbalenya, A.E., Decroly,  
631 E., Snijder, E.J., Canard, B., and Imbert, I. (2014). One severe acute respiratory syndrome  
632 coronavirus protein complex integrates processive RNA polymerase and exonuclease activities.  
633 *Proc. Natl. Acad. Sci. USA.* *111*, e3900-3909.

634 Vicenzi, E., Canducci, F., Pinna, D., Mancini, N., Carletti, S., Lazzarin, A., Bordignon, C., Poli,

- 635 G., and Clementi, M. (2004). Coronaviridae and SARS-associated coronavirus strain HSR1.  
636 *Emerg. Infect. Dis.* *10*, 413-418.
- 637 Wang, D., Hu, B., Hu, C., Zhu, F., Liu, X., Zhang, J., Wang, B., Xiang, H., Cheng, Z., Xiong,  
638 Y., *et al.* (2020). Clinical characteristics of 138 hospitalized patients with 2019 novel  
639 coronavirus-infected pneumonia in Wuhan, China. *JAMA* *323*, 1061-1069.
- 640 Yin, W., Mao, C., Luan, X., Shen, D.-D., Shen, Q., Su, H., Wang, X., Zhou, F., Zhao, W., Gao,  
641 M., *et al.* (2020). Structural basis for the inhibition of the RNA-dependent RNA polymerase  
642 from SARS-CoV-2 by Remdesivir. *bioRxiv*, 2020.2004.2008.032763.
- 643 Zhai, Y.J., Sun, F., Li, X.M., Pang, H., Xu, X.L., Bartlam, M., and Rao, Z.H. (2005). Insights  
644 into SARS-CoV transcription and replication from the structure of the nsp7-nsp8 hexadecamer.  
645 *Nat. Struct. Mol. Biol.* *12*, 980-986.
- 646 Zhang, Y.Z., and Holmes, E.C. (2020). A genomic perspective on the origin and emergence of  
647 SARS-CoV-2. *Cell* *181*, 1-5.
- 648 Zhao, B.Y., Yi, G.H., Du, F.L., Chuang, Y.C., Vaughan, R.C., Sankaran, B., Kao, C.C., and Li,  
649 P.W. (2017). Structure and function of the Zika virus full-length NS5 protein. *Nat. Commun.* *8*,  
650 14762-14770.
- 651 Zheng, S.Q., Palovcak, E., Armache, J.P., Verba, K.A., Cheng, Y.F., and Agard, D.A. (2017).  
652 MotionCor2: anisotropic correction of beam-induced motion for improved cryo-electron  
653 microscopy. *Nat. Methods* *14*, 331-332.
- 654 Zhong, N.S., Zheng, B.J., Li, Y.M., Poon, Xie, Z.H., Chan, K.H., Li, P.H., Tan, S.Y., Chang, Q.,  
655 Xie, J.P., *et al.* (2003). Epidemiology and cause of severe acute respiratory syndrome (SARS)  
656 in Guangdong, People's Republic of China, in February, 2003. *Lancet* *362*, 1353-1358.

657 Zhou, P., Yang, X.L., Wang, X.G., Hu, B., Zhang, L., Zhang, W., Si, H.R., Zhu, Y., Li, B.,  
658 Huang, C.L., *et al.* (2020). A pneumonia outbreak associated with a new coronavirus of  
659 probable bat origin. *Nature* 579, 270-273.

660 Zhu, N., Zhang, D., Wang, W., Li, X., Yang, B., Song, J., Zhao, X., Huang, B., Shi, W., Lu, R.,  
661 *et al.* (2020). A novel coronavirus from patients with pneumonia in China, 2019. *N. Engl. J.*  
662 *Med.* 382, 727-733.

663 Ziebuhr, J. (2005). The coronavirus replicase. *Curr. Top. Microbiol. Immunol.* 287, 57-94.

664 Zivanov, J., Nakane, T., Forsberg, B.O., Kimanius, D., Hagen, W.J., Lindahl, E., and Scheres,  
665 S.H. (2018). New tools for automated high-resolution cryo-EM structure determination in  
666 RELION-3. *eLife* 7, e42166.

667
